# Supplementary material for: Flexible and highly sensitive pressure sensors based on microcrack arrays inspired by scorpions
Source: Royal Society of Chemistry journal article supplement (doi:10.1039/c9ra03663f), 2019-01-01
Supplement: c9ra03663f1.pdf [file c9ra03663f1.pdf]

## **Electronic Supplementary Information (ESI)**

### **Flexible and highly sensitive pressure sensors based on microcrack arrays inspired by scorpion**

**Authors: Junqiu Zhang,<sup>a,b</sup> Tao Sun,<sup>a</sup> Linpeng Liu,<sup>a</sup> Shichao Niu,<sup>a</sup> Kejun Wang,<sup>a</sup> Honglie Song,<sup>c</sup> Qigang Han,<sup>d</sup> Zhiwu Han,<sup>a\*</sup> Luquan Ren,<sup>a</sup> Qiao Lin<sup>b</sup>**

**<sup>a</sup> Key Laboratory of Bionic Engineering, Ministry of Education, Jilin University,  
130022, People's Republic of China. E-mail: [zwhan@jlu.edu.cn](mailto:zwhan@jlu.edu.cn).**

**<sup>b</sup> Department of Mechanical Engineering, Columbia University, 500 West. 120th Street,  
New York, 10027, USA**

**<sup>c</sup> Department of Engineering Mechanics, Center for Flexible Electronics Technology,  
Center for Mechanics and Materials, Tsinghua University, Beijing 100084, People's  
Republic of China**

**<sup>d</sup> College of Materials Science and Engineering, Jilin University, 130022, People's  
Republic of China**

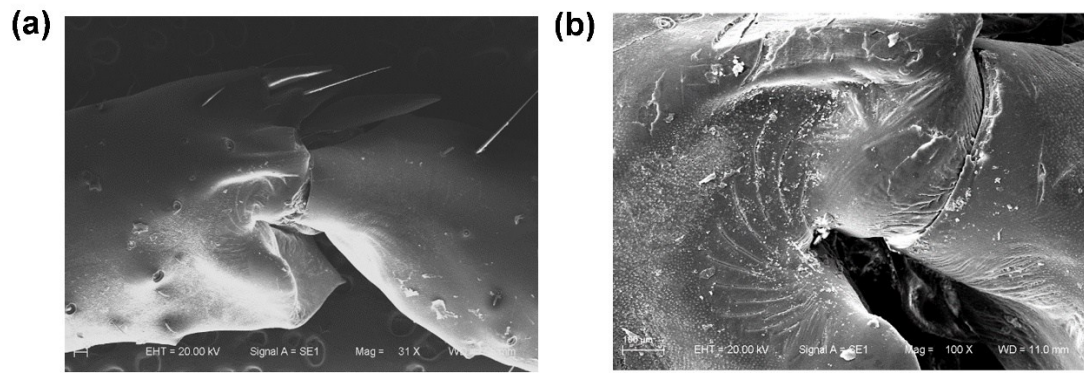

**Figure S1** Slit sensillum of scorpion. (a) SEM image shows the slit sensillum positioned in the distal end of the metatarsus. (b) SEM image of the overall slit sensillum.

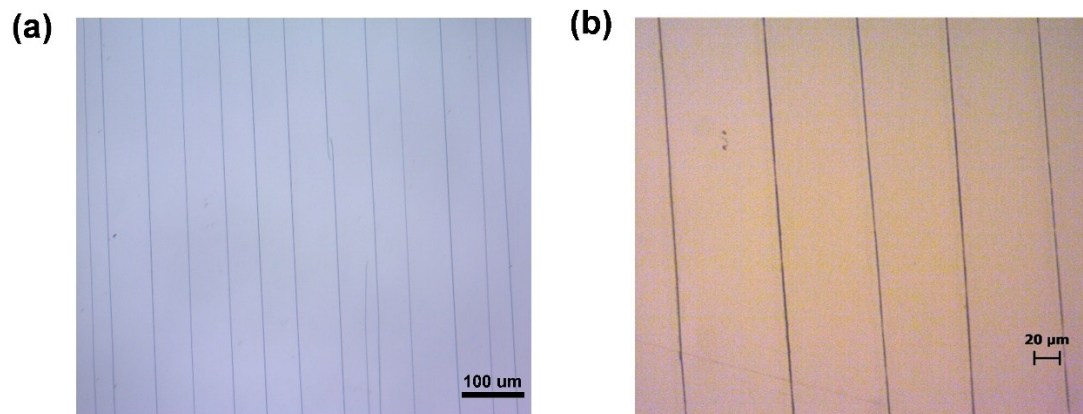

**Figure S2** The crack arrays presented on the top of the petri dish lid. (a), (b) Metallographic microscopic images of the petri dish lid after solvent-induced.

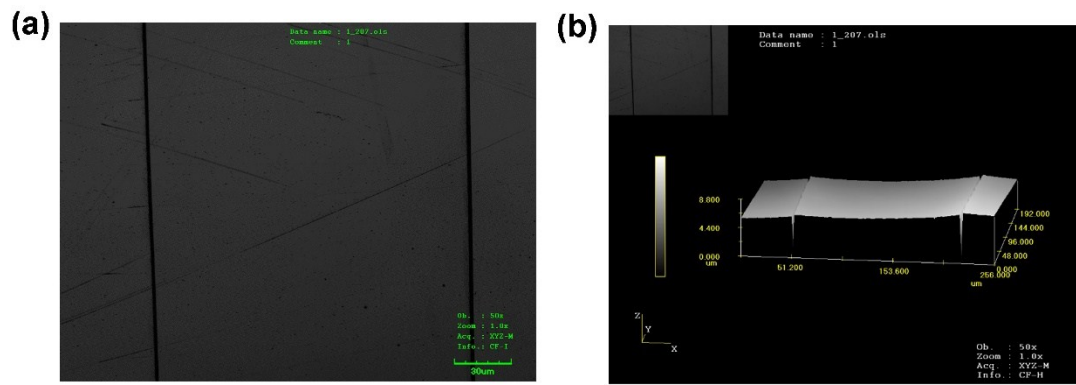

**Figure S3** The crack arrays presented on the top of PDMS. (a), (b) Confocal microscopy images show the approximately parallel microcracks in a small visual field.

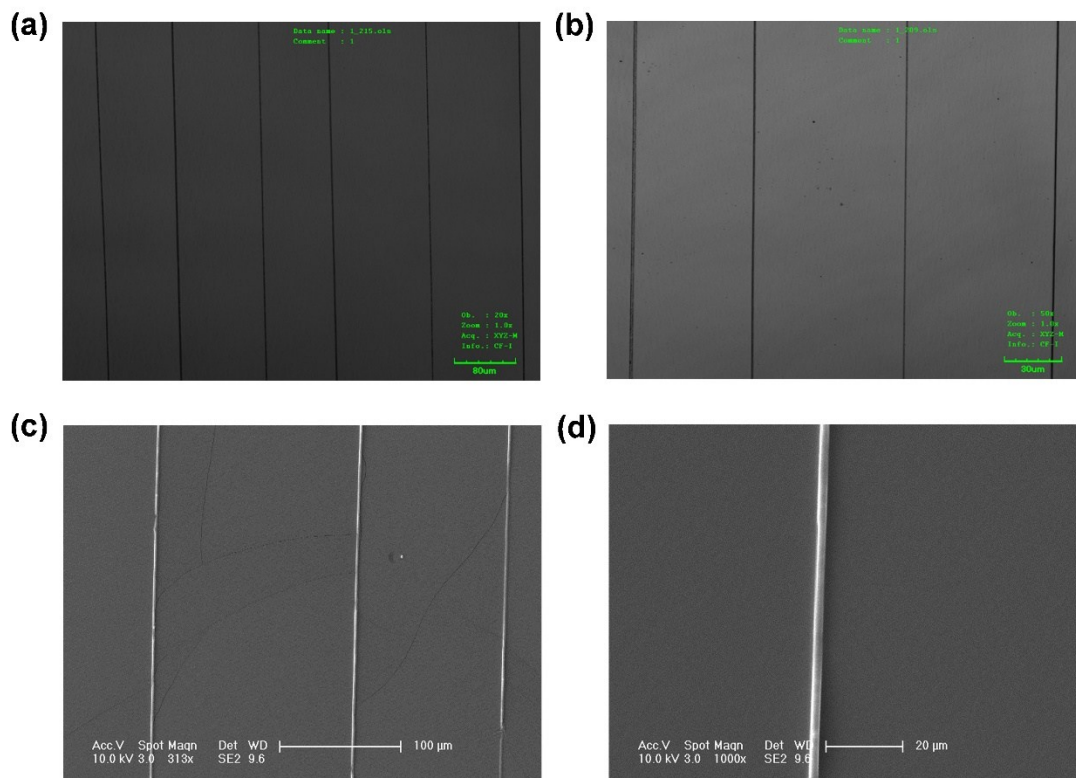

**Figure S4** The reversed pattern of crack arrays presented on the top of PDMS. (a), (b) Confocal microscopy images show the arrangement of the reversed pattern of crack arrays. (c), (d) SEM images showing more details about the reversed pattern of crack arrays.

**Table S1** The comparison of the sensitivities for previous reported pressure sensors.

| Microstructure surface      | Sensitivity (kPa <sup>-1</sup> ) <sup>a</sup> | Working principle | Response time (ms) | Ref. |
|-----------------------------|-----------------------------------------------|-------------------|--------------------|------|
| Random Distributed Spinosum | 30.1–25.1                                     | piezoresistive    | millisecond range  | 1    |
| Hemisphere                  | 5.53–15.14                                    | piezoresistive    | 40                 | 2    |
| Pyramid 1                   | 0.76                                          | capacitance       |                    | 3    |
| Pyramid 2                   | 5.53                                          | piezoresistive    | 0.2                | 4    |
| Pyramid 3                   | 0.31                                          | piezoelectric     | 5                  | 5    |
| Cylinder                    | 2.0                                           | piezoresistive    | 50                 | 6    |
| Pyramid & Cylinder          | 0.54–0.58                                     | capacitance       | 30                 | 7    |
| Wave                        | 3.8                                           | capacitance       | 150                | 8    |
| Pillar                      | 1.8                                           | piezoresistive    | 100                | 9    |
| Nanowire 1                  | 5.54                                          | capacitance       | unstated           | 10   |
| Nanowire 2                  | 0.33                                          | piezoresistive    | 1                  | 11   |
| Pillar & nanowire           | 6.82                                          | piezoresistive    | 5                  | 12   |
| Prism                       | 1.8                                           | piezoresistive    | 10                 | 13   |
| Microgrooves                | 7.7–41.9                                      | piezoresistive    | 50                 | 14   |

a) Note that all the sensitivities have defined as an absolute value.

## Reference

- 1 Y. Pang, K. Zhang, Z. Yang, S. Jiang, Z. Ju, Y. Li, X. Wang, D. Wang, M. Jian, Y. Zhang, R. Liang, H. Tian, Y. Yang and T. Ren, *ACS Nano*, 2018, **12**, 2346–2354.
- 2 J. Park, Y. Lee, J. Hong, M. Ha, Y. Jung, H. Lim, S. Y. Kim and H. Ko, *ACS Nano*, 2014, **8**, 4689–4697.
- 3 C. M. Boutry, A. Nguyen, Q. O. Lawal and A. Chortos, *Adv. Mater.*, 2015, **27**, 6954–6961.
- 4 B. Zhu, Z. Niu, H. Wang, W. R. Leow, H. Wang and Y. Li, *Small*, 2014, **10**, 3625–3631.
- 5 L. Lin, Y. Xie, S. Wang, W. Wu, S. Niu, X. Wen, Z. L. Wang and L. I. N. E. T. Al, *ACS Nano*, 2013, **7**, 8266–8274.
- 6 H. Park, Y. R. Jeong, J. Yun, S. Y. Hong, S. Jin, S. Lee and P. E. T. Al, *ACS Nano*, 2015, **9**, 9974–9985.
- 7 C. Pang, J. H. Koo, A. Nguyen, J. M. Caves, M. G. Kim, A. Chortos, K. Kim, P. J. Wang, J. B. H. Tok and Z. Bao, *Adv. Mater.*, 2015, **27**, 634–640.
- 8 Y. Joo, J. Byun, N. Seong, J. Ha, H. Kim, S. Kim, T. Kim, H. Im, D. Kim and Y. Hong, *Nanoscale*, 2015, **7**, 6208–6215.
- 9 Q. Shao, Z. Niu, M. Hirtz, L. Jiang, Y. Liu, Z. Wang and X. Chen, *Small*, 2014, **10**, 1466–1472.
- 10 J. Wang, J. Jiu, M. Nogi, T. Sugahara, S. Nagao, H. Koga, P. He and K. Suganuma, *Nanoscale*, 2015, **7**, 2926–2932.
- 11 W. He, G. Li, S. Zhang, Y. Wei, J. Wang and Q. Li, *ACS Nano*, 2015, **9**, 4244–4251.
- 12 M. Ha, S. Lim, J. Park, D. Um and Y. Lee, *Adv. Funct. Mater.*, 2015, **25**, 2841–2849.
- 13 X. Wang, Y. Gu, Z. Xiong, Z. Cui and T. Zhang, *Adv. Mater.*, 2014, **26**, 1336–1342.
- 14 L. Pan, A. Chortos, G. Yu, Y. Wang, S. Isaacson, R. Allen, Y. Shi, R. Dauskardt and Z. Bao, *Nat. Commun.*, 2014, **5**, 3002.
